# Supplementary material for: 16S rRNA Long-Read Sequencing of the Granulation Tissue from Nonsmokers and Smokers-Severe Chronic Periodontitis Patients
Source: Hindawi journal article supplement (doi:10.1155/2018/4832912), 2018-06-14
Supplement: f1 [file 4832912.f1.pdf]

**Supplementary Figure 1: Taxonomic Hits Distribution of Five (CP+S) patients sample:** The charts represent the distribution of taxa using a contigLCA algorithm finding a single consensus taxonomic entity at Phylum level on each individual sample.

**Supplementary Figure 2: Taxonomic Hits Distribution of Five (CP+S) patients sample:** The charts represent the distribution of taxa using a contigLCA algorithm finding a single consensus taxonomic entity at genus level on each individual sample.

**Supplementary Figure 3: Taxonomic Hits Distribution of Five (S) Control sample:** The charts represent the distribution of taxa using a contigLCA algorithm finding a single consensus taxonomic entity at Phylum level on each individual sample.

**Supplementary Figure 4: Taxonomic Hits Distribution of Five (S) Control sample:** The charts represent the distribution of taxa using a contigLCA algorithm finding a single consensus taxonomic entity at genus level on each individual sample.

**Supplementary Figure 5: Alpha diversity of five control (a) and experimental (b) samples:** The above images show the range of  $\alpha$ -diversity values. The min, max, and mean values are shown, with the standard deviation ranges ( $\sigma$  and  $2\sigma$ ) in different shades. The  $\alpha$ -diversity of this metagenome is shown in red.

**Supplementary Figure 6: Rarefaction curve of five control (a) and experimental (b) samples:** The plot shows the rarefaction curve of the total number of annotated species richness per sample as a function of the number of sequences sampled.

**Supplementary Table 1:** Screening of 30 Chronic Periodontitis (CP) patients where, five patients (CP\_B1, CP\_B2, CP\_C1, CP\_C2, CP\_D1) with the history of smoking and tobacco chewing, bleeding on probing, Periodontal pockets  $\geq 5$ mm and having Clinical attachment loss (CAL) were selected as experimental group (CP+S). Five patients of corresponding age group (CP\_6, CP\_7, CP\_8, CP\_15, CP\_20) with the history of no smoking and tobacco chewing, bleeding on probing, Periodontal pockets  $\geq 5$ mm and having Clinical attachment loss (CAL) were included as control group. Raw reads and filtered consensus sequences (CCS) obtained after demultiplexing of barcoded individual samples.

| <b>Group</b>                   | <b>Sample</b> | <b>Age</b> | <b>Raw Reads</b> | <b>Filtered Reads</b> |
|--------------------------------|---------------|------------|------------------|-----------------------|
| Control (CP without smoking)   | CP6           | 50         | 18441            | 12727                 |
|                                | CP7           | 60         | 22446            | 18378                 |
|                                | CP8           | 60         | 14842            | 7825                  |
|                                | CP15          | 55         | 14778            | 10887                 |
|                                | CP20          | 66         | 11332            | 5860                  |
| Experimental (CP with Smoking) | CP_D1         | 60         | 12658            | 1379                  |
|                                | CP_B1         | 42         | 21749            | 19564                 |
|                                | CP_B2         | 50         | 15976            | 10155                 |
|                                | CP_C1         | 47         | 14342            | 5197                  |
|                                | CP_C2         | 67         | 16982            | 7194                  |
| Total Reads                    |               |            | 163546           | 99166                 |

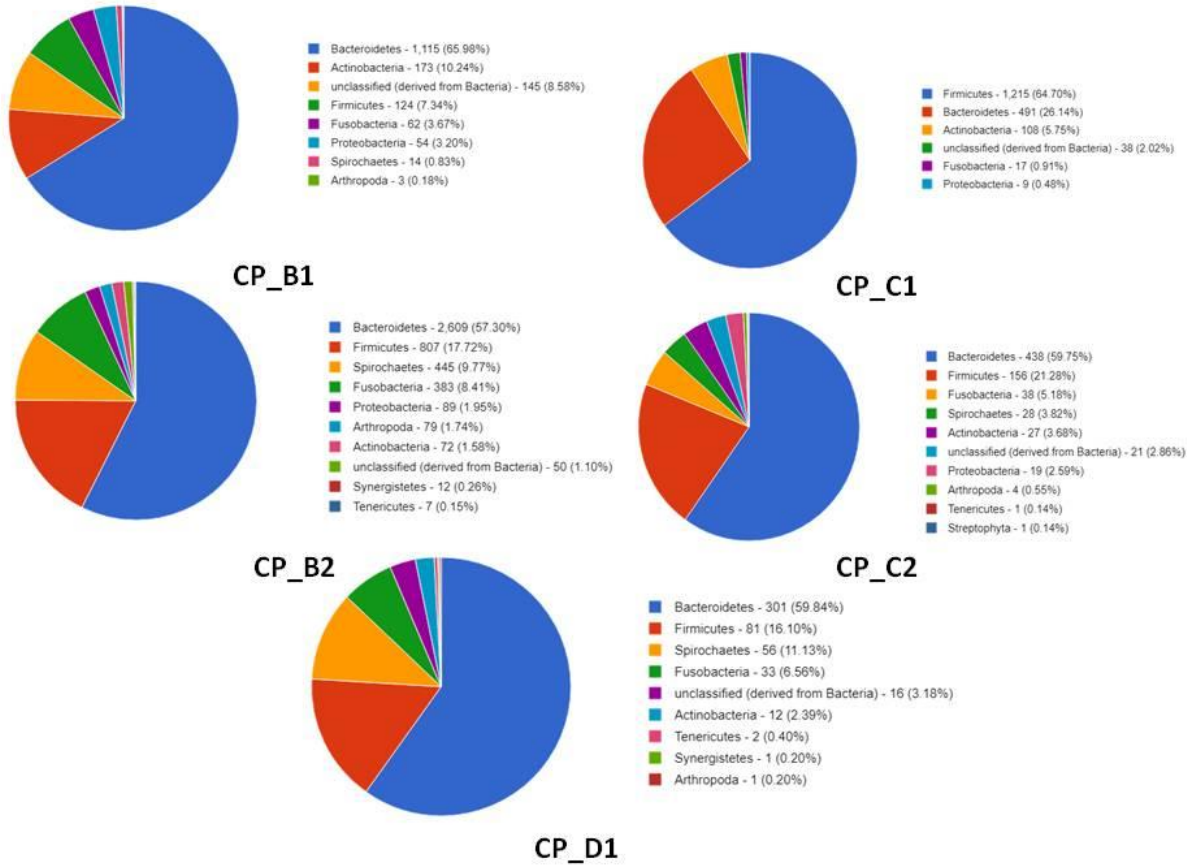

**Supplementary Figure 1**

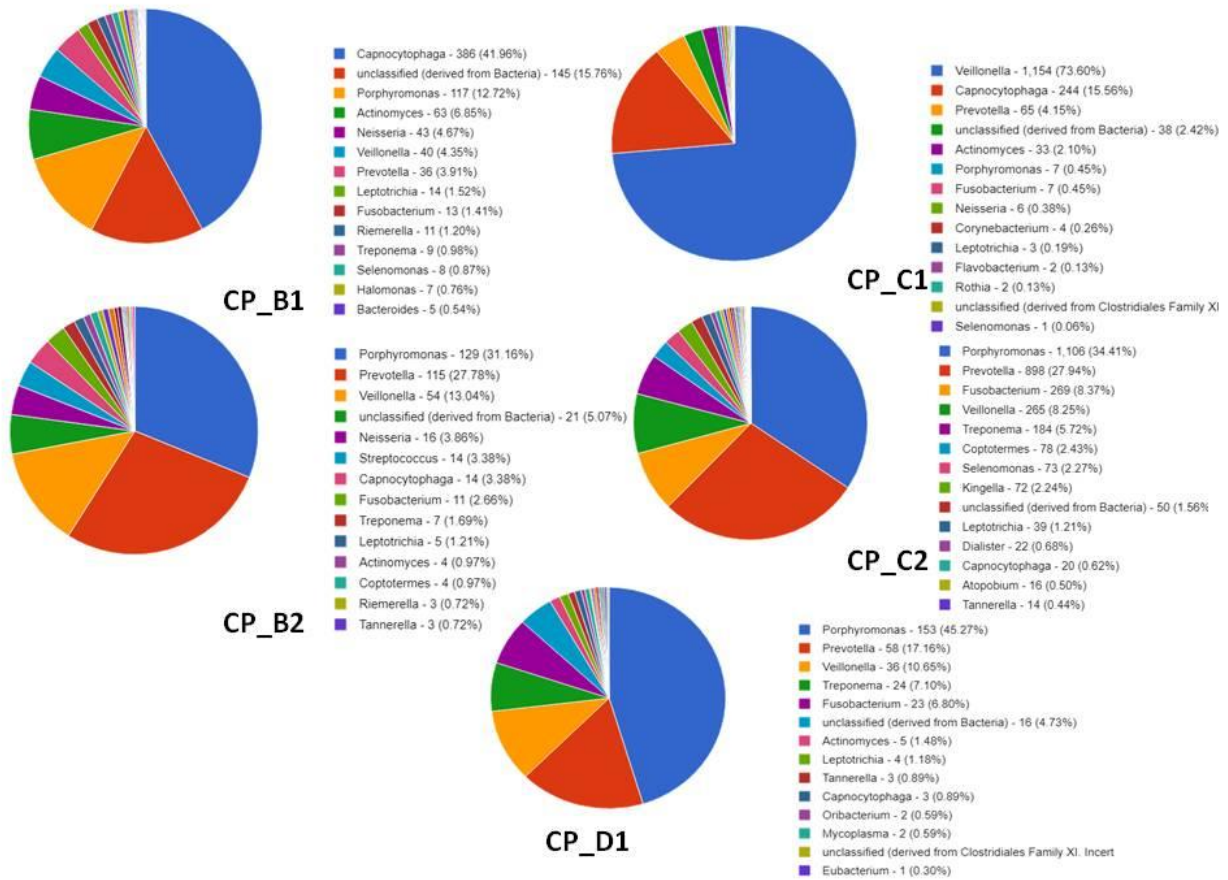

**Supplementary Figure 2**

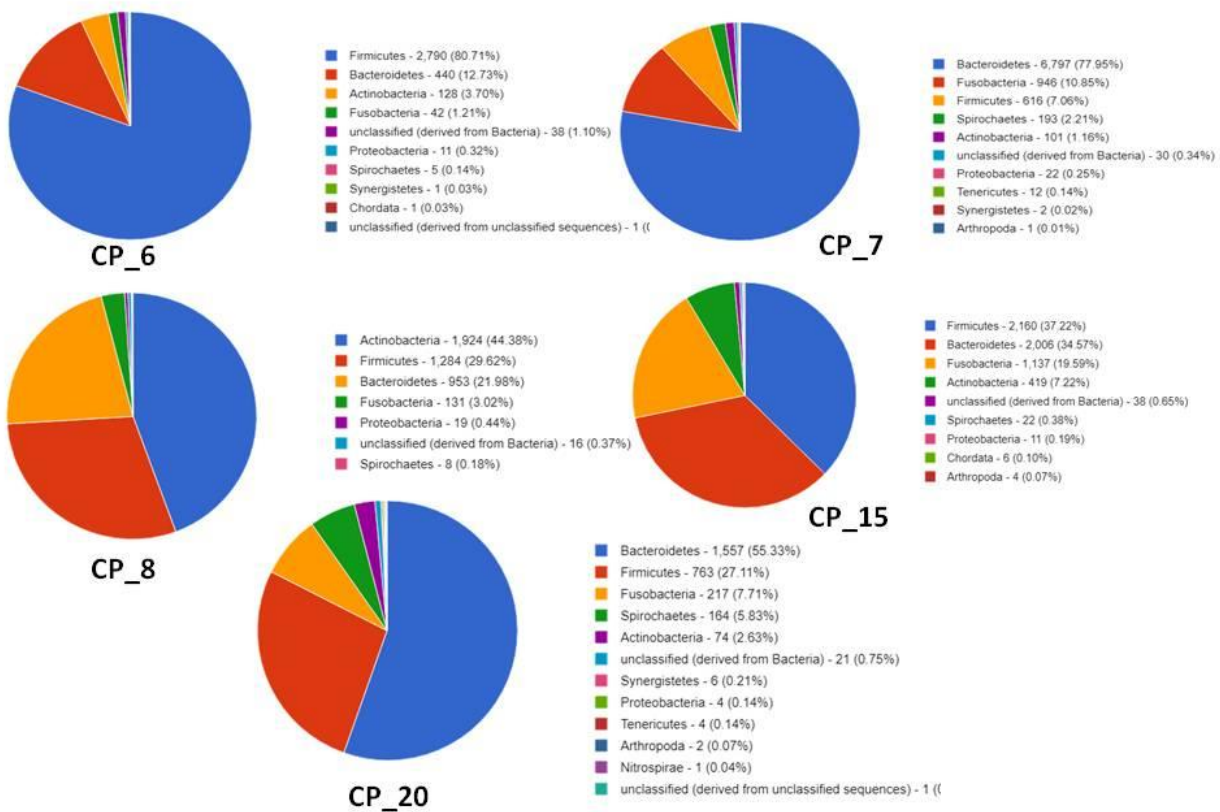

**Supplementary Figure 3**

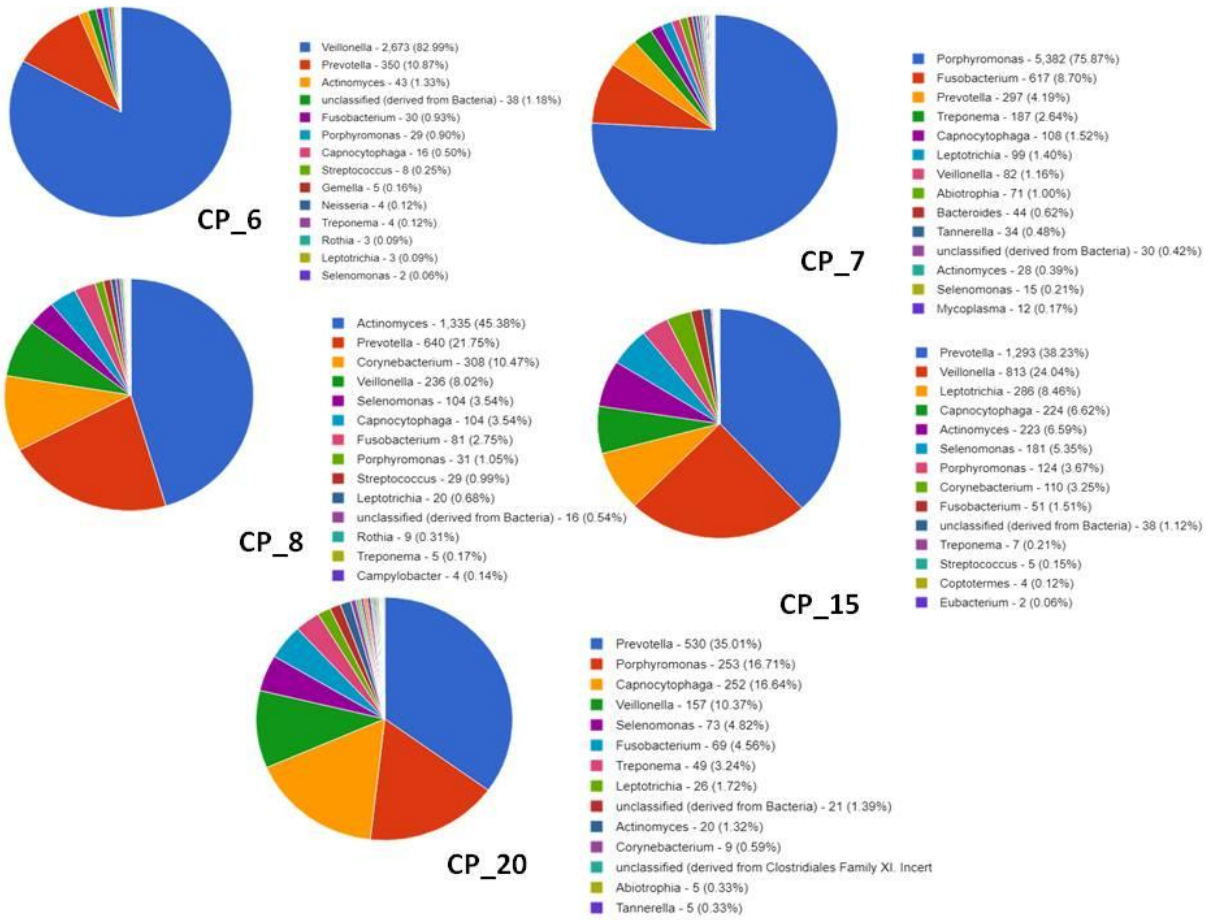

Supplementary Figure 4

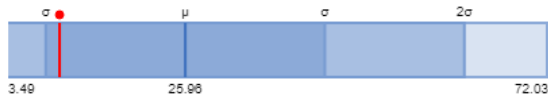

**CP-6:** The  $\alpha$ -diversity of this data set is 10 species.

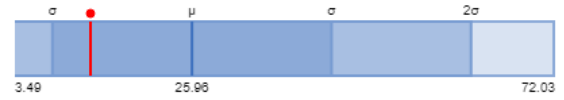

**CP\_7:** The  $\alpha$ -diversity of this data set is 13 species.

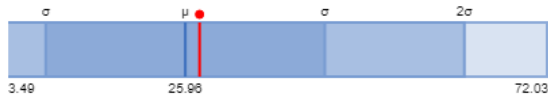

**CP-8:** The  $\alpha$ -diversity of this data set is 28 species.

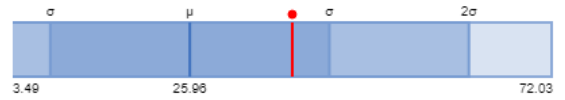

**CP\_15:** The  $\alpha$ -diversity of this data set is 39 species.

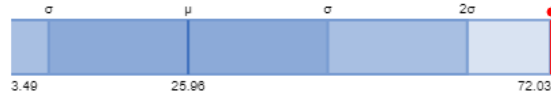

**CP-20:** The  $\alpha$ -diversity of this data set is 72 species.

**(a)**

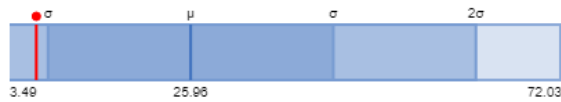

**CP-B1:** The  $\alpha$ -diversity of this data set is 7 species.

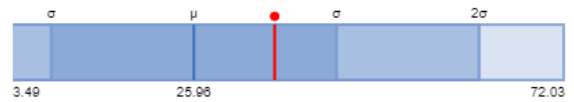

**CP\_B2:** The  $\alpha$ -diversity of this data set is 36 species.

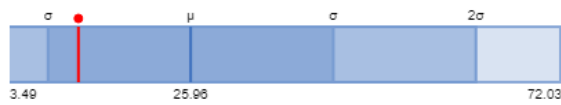

**CP\_C1:** The  $\alpha$ -diversity of this data set is 12 species.

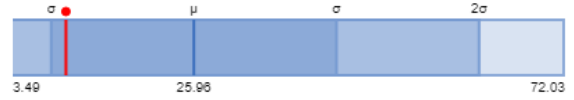

**CP\_C2:** The  $\alpha$ -diversity of this data set is 10 species.

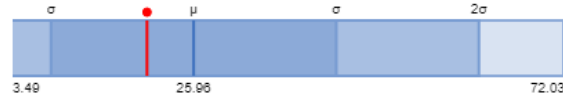

**CP\_D1:** The  $\alpha$ -diversity of this data set is 20 species.

**(b)**

**Supplementary Figure 5**

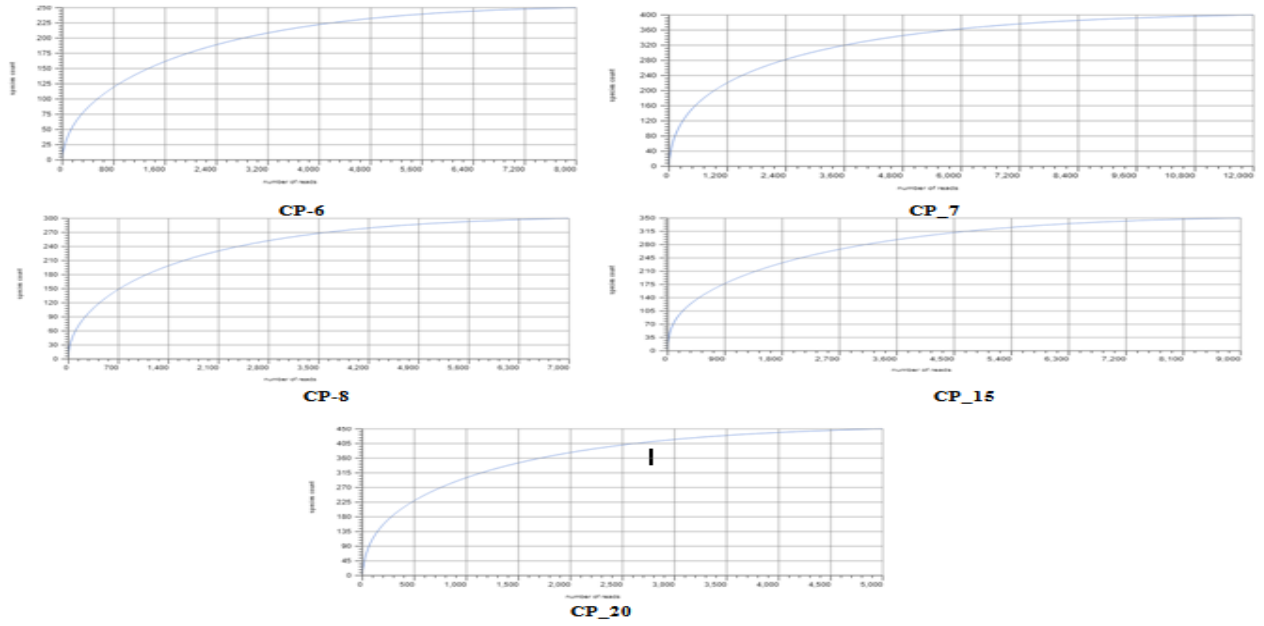

(a)

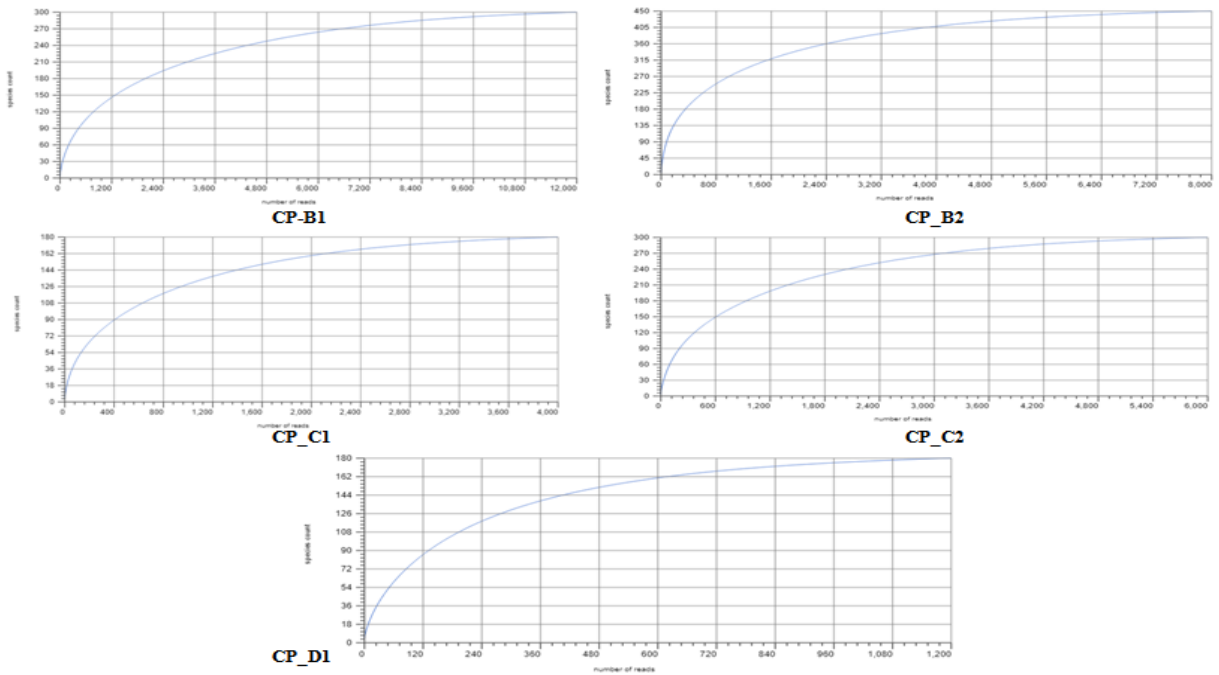

(b)

Supplementary Figure 6
